# Supplementary material for: Phylogeny of Crepidotus applanatus Look-Alikes Reveals a Convergent Morphology Evolution and a New Species C. pini
Source: MDPI journal article supplement (doi:10.3390/jof8050489), 2022-05-07
Supplement: s1 [file s1]

**Table S2:** ITS and LSU nrDNA sequences of *Crepidotus* and of the outgroup used in the phylogenetic analysis. Sequences obtained in this study are in bold. Full citations of published sources are bellow.

| <b>Taxon</b>             | <b>Specimen voucher / isolate</b> | <b>Country of origin</b> | <b>GenBank<br/>no.<br/>ITS</b> | <b>GenBank<br/>no.<br/>LSU</b> | <b>Sources</b>                                  |
|--------------------------|-----------------------------------|--------------------------|--------------------------------|--------------------------------|-------------------------------------------------|
| <i>C. aureus</i>         | OKM27300                          | Puerto Rico              | -                              | AF205685                       | Aime (1999)                                     |
| <i>C. alabamensis</i>    | MCA778                            | USA                      | -                              | AF367960                       | Aime, M.C. (unpubl.)                            |
| <i>C. albolanatus</i>    | PDD 72865 (holotype)              | New Zealand              | NR159820                       | -                              | Horak (2018)                                    |
| <i>C. amygdalosporus</i> | OKM 26740                         | USA (Virginia)           | -                              | AF205678                       | Aime (1999)                                     |
|                          | MCA258                            | USA (Virginia)           | -                              | AF205675                       | Aime (1999)                                     |
| <i>C. antillarum</i>     | OKM26827                          | Dominican Republic       | -                              | AF205680                       | Aime (1999)                                     |
| <i>C. applanatus</i>     | SLO 2551                          | Slovakia                 | <b>OM832526</b>                | <b>OM832560</b>                | <b>This study</b>                               |
|                          | SLO 2534                          | Slovakia                 | <b>OM832521</b>                | <b>OM832556</b>                | <b>This study</b>                               |
|                          | SLO 2537                          | Slovakia                 | <b>OM832522</b>                | <b>OM832557</b>                | <b>This study</b>                               |
|                          | SLO 2539                          | Slovakia                 | <b>OM832523</b>                | <b>OM832558</b>                | <b>This study</b>                               |
|                          | SLO 2533                          | Slovakia                 | <b>OM832524</b>                | <b>OM832555</b>                | <b>This study</b>                               |
|                          | SLO 2528                          | Slovakia                 | <b>OM832520</b>                | <b>OM832554</b>                | <b>This study</b>                               |
|                          | SLO 2547                          | Slovakia                 | <b>OM832525</b>                | <b>OM832559</b>                | <b>This study</b>                               |
|                          | SLO 2581                          | Norway                   | <b>OM832528</b>                | <b>OM832561</b>                | <b>This study</b>                               |
|                          | WU 29809                          | Germany                  | KF879613                       | -                              | Jančovičová et al. (2014)                       |
|                          | WU 29794                          | Austria                  | KF879614                       | -                              | Jančovičová et al. (2014)                       |
|                          | SLO 1821                          | Slovakia                 | MF621028                       | -                              | Jančovičová et al. (2017)                       |
|                          | SLO 1492                          | Slovakia                 | MF621029                       | -                              | Jančovičová et al. (2017)                       |
|                          | KA12-0350                         | Republic of Korea        | KR673425                       | -                              | Kim et al. (2015)                               |
|                          | KA12-0390                         | Republic of Korea        | KR673447                       | -                              | Kim et al. (2015)                               |
|                          | KA12-1370                         | Republic of Korea        | KR673581                       | -                              | Kim et al. (2015)                               |
|                          | KA13-0932                         | Republic of Korea        | KR673659                       | -                              | Kim et al. (2015)                               |
|                          | BIOUG24046-F04                    | Canada (Ontario)         | KT695357                       | -                              | Telfer (2015)                                   |
|                          | TENN 61392 clone C3               | USA (Tennessee)          | FJ596803                       | -                              | Hughes et al. (2009)                            |
|                          | NAMA 2015-353                     | USA (North Carolina)     | MH910575                       | -                              | Russell, S.D.; Rojas, J.A.;                     |
|                          | Mushroom Observer #<br>247314     |                          |                                |                                | Vilgalys, R. (unpubl.)                          |
|                          | D93-F12-ITS4_K23.ab1              | USA (Arkansas)           | MN826231                       | -                              | Alshammari, N.I.; Stephenson,<br>S.L. (unpubl.) |
|                          | D93-F6-ITS1_K11.ab1               | USA (Arkansas)           | MN826230                       | -                              | Alshammari, N.I.; Stephenson,<br>S.L. (unpubl.) |
|                          | MHHNU 31061                       | China                    | MK250928                       | -                              | Chen, Z.H.; Zhang, P.; Li, S.N.<br>(unpubl.)    |
|                          | PUL F27036                        | USA (Wisconsin)          | MW448624                       | -                              | Dirks, A.C. (unpubl.)                           |
|                          | 180524-H06                        | Republic of Korea        | MN082534                       | -                              | Cho, J.-H.; An, G.-H.; Han, J.-G.<br>(unpubl.)  |
|                          | 420526MF0689                      | China                    | -                              | MG712368                       | Wang, R.; Zhang, X., Yan, S.Z.;                 |

|                                            |                       |                      |                 |                 |                                                                                 |
|--------------------------------------------|-----------------------|----------------------|-----------------|-----------------|---------------------------------------------------------------------------------|
|                                            | 420526MF0534          | China                | -               | MH141341        | Chen, S.L. (unpubl.)<br>Wang, R.; Zhang, X., Yan, S.Z.;<br>Chen, S.L. (unpubl.) |
|                                            | TM03_415              | Canada               | -               | EU522804        | Porter et al. (2008)                                                            |
|                                            | MCA 170               | USA (Virginia)       | -               | AF205694        | Aime (1999)                                                                     |
| <i>C. applanatus</i> var. <i>globigera</i> | MCA 188               | USA (Virginia)       | -               | AF205673        | Aime (1999)                                                                     |
| <i>C. asiaticus</i>                        | TJB9995LSU (holotype) | Thailand             | -               | MF077336        | Guzmán-Dávalos et al. (2017)                                                    |
| <i>C. cf. applanatus</i>                   | PBM717                | USA (Washington)     | DQ202273        | AY380406        | Matheny (2007) / Matheny<br>(2005)                                              |
|                                            | Montri-173            | Switzerland          | MK028392        | -               | Hofstetter et al. (2019)                                                        |
|                                            | WTU-F-073211          | USA (Washington)     | MT946689        | -               | Trudell, S.; Gordon, M.<br>(unpubl.)                                            |
| <i>C. betulae</i>                          | MCA384                | USA (North Carolina) |                 | AF205679        | Aime (1999)                                                                     |
| <i>C. brunnescens</i>                      | MICH10455 (paratype)  | USA (Michigan)       | -               | MF621025        | Jančovičová et al. (2017)                                                       |
|                                            | MCA 864               | USA (Virginia)       | -               | AF367936        | Aime (2001)                                                                     |
| <i>C. calolepis</i>                        | TUF118750             | Estonia              | UDB019553       |                 | <a href="https://unite.ut.ee">https://unite.ut.ee</a>                           |
| <i>C. cesatii</i>                          | DB3782                | Hungary              | -               | MK277881        | Varga et al. (2019)                                                             |
|                                            | TUF120093             | Estonia              | UDB023726       | -               | <a href="https://unite.ut.ee">https://unite.ut.ee</a>                           |
| <i>C. cinnabarinus</i>                     | MCA387                | USA (xxx)            | -               | AF205686        | Aime (1999)                                                                     |
| <i>C. crocophyllus</i>                     | SLO 2588              | Slovakia             | <b>OM832530</b> | <b>OM832563</b> | <b>This study</b>                                                               |
|                                            | SLO 2433              | Slovakia             | <b>OM832529</b> | <b>OM832562</b> | <b>This study</b>                                                               |
|                                            | SLO 2590              | Slovakia             | <b>OM832531</b> | <b>OM832564</b> | <b>This study</b>                                                               |
|                                            | SJ1                   | Slovakia             | -               | AF367939        | Aime (2001)                                                                     |
|                                            | KA12-0349             | Republic of Korea    | KR673424        | -               | Kim et al. (2015)                                                               |
|                                            | KA12-1376             | Republic of Korea    | KR673586        | -               | Kim et al. (2015)                                                               |
|                                            | KA12-1407             | Republic of Korea    | KR673601        | -               | Kim et al. (2015)                                                               |
|                                            | SLO 2553              | USA (North Carolina) | <b>OM832527</b> | -               | <b>This study</b>                                                               |
|                                            | TENN 61519 clone C1   | USA (Tennessee)      | FJ596821        | -               | Hughes et al. (2009)                                                            |
|                                            | PBM3047               | USA (California)     | -               | GQ893025        | Kumar et al. (2020)                                                             |
|                                            | OKM 26173             | USA (Missouri)       | -               | AY029707        | Aime (2001)                                                                     |
|                                            | OKM 25806             | USA (Virginia)       | -               | AF367938        | Aime (2001)                                                                     |
|                                            | RGT 930924/02         | USA (Wisconsin)      | -               | AF139946        | Aime (2001)                                                                     |
| <i>C. dentatus</i>                         | HMJAU37097 (holotype) | China                | NR173279        |                 | Ge & Bau (2020)                                                                 |
| <i>C. distortus</i>                        | MCA 386               | USA (Virginia)       | -               | AF205671        | Aime (1999)                                                                     |
| <i>C. ehrendorferi</i>                     | SLO 2558              | Slovakia             | <b>OM832533</b> | -               | <b>This study</b>                                                               |
|                                            | SLO 2587              | Slovakia             | <b>OM832534</b> | <b>OM832566</b> | <b>This study</b>                                                               |
|                                            | SLO 707               | Slovakia             | <b>OM832532</b> | <b>OM832565</b> | <b>This study</b>                                                               |
|                                            | WU 6554 (holotype)    | Austria              | MH780918        | -               | Liu et al. (2018)                                                               |
|                                            | WU 20080              | France               | MH780919        | -               | Liu et al. (2018)                                                               |
|                                            | PV 218                | Hungary              | MH780920        | -               | Liu et al. (2018)                                                               |
| <i>C. ellipsoideus</i>                     | G1955                 | USA                  | -               | MK277883        | Varga et al. (2019)                                                             |
| <i>C. epibryus</i>                         | TUF118984             | Estonia              | UDB023702       | -               | <a href="https://unite.ut.ee">https://unite.ut.ee</a>                           |
|                                            | IBNR1997/0948         | Russia               | -               | AF367934        | Aime et al. (2005)                                                              |

|                                           |                        |                                |                 |                 |                                                                                                          |
|-------------------------------------------|------------------------|--------------------------------|-----------------|-----------------|----------------------------------------------------------------------------------------------------------|
| <i>C. exiguus</i>                         | TBGT17176 (holotype)   | India                          | -               | MK567974        | Kumar et al. (2022)                                                                                      |
| <i>C. exilis</i>                          | TBGT17157 (holotype)   | India                          | -               | MK878548        | Kumar et al. (2020)                                                                                      |
| <i>C. fragilis</i>                        | MCA904                 | USA (Virginia)                 | -               | AF367931        | Aime et al. (2005)                                                                                       |
| <i>C. fraxinicola</i>                     | OKM26739               | USA (Washington)               | -               | AF205676        | Aime (1999)                                                                                              |
| <i>C. globisporus</i>                     | TBGT17341 (holotype)   | India                          | -               | MK878540        | Kumar et al. (2020)                                                                                      |
| <i>C. indicus</i>                         | TBGT17161 (holotype)   | India                          | -               | MG735357        | Kumar et al. (2018a)                                                                                     |
| <i>C. inhonestus</i>                      | MCA638                 | Japan                          | -               | AF205704        | Moncalvo et al. (2002)                                                                                   |
| <i>C. iqbalii</i>                         | LAH 36654 (holotype)   | Pakistan                       | NR173306        | NG079698        | Izhar et al. (2021)                                                                                      |
| <i>C. kauffmanii</i>                      | G1956                  | USA                            | -               | MK277887        | Varga et al. (2019)                                                                                      |
| <i>C. lanuginosus</i>                     | OKM27331               | USA (Idaho)                    | -               | AF367940        | Aime & Miller (2002)                                                                                     |
| <i>C. lateralipes</i>                     | PDD 72508 (holotype)   | New Zealand                    | NR159821        | -               | Horak (2018)                                                                                             |
| <i>C. lundelii</i>                        | TUF106886              | Estonia                        | UDB015199       | -               | <a href="https://unite.ut.ee">https://unite.ut.ee</a>                                                    |
|                                           | IBNR1997/0946          | Russia                         | -               | AF367941        | Aime, M.C. (unpubl.)                                                                                     |
| <i>C. luteolus</i>                        | 16834                  | Italy                          | JF907963        | -               | <a href="https://nature.berkeley.edu">https://nature.berkeley.edu</a>                                    |
| <i>C. lutescens</i>                       | HMJAU 37002 (holotype) | China                          | NR158400        | -               | Ge et al. (2017)                                                                                         |
| <i>C. macedonicus</i>                     | PV773                  | Hungary                        | MH780921        | -               | Liu et al. (2018)                                                                                        |
| <i>C. malachioides</i>                    | SLO 2578               | Slovakia                       | <b>OM832538</b> | <b>OM832568</b> | <b>This study</b>                                                                                        |
|                                           | SLO 2391               | Slovakia                       | <b>OM832536</b> | <b>OM832567</b> | <b>This study</b>                                                                                        |
|                                           | SLO 2561               | Slovakia                       | <b>OM832537</b> | -               | <b>This study</b>                                                                                        |
|                                           | SLO 1932               | Slovakia                       | <b>OM832535</b> | -               | <b>This study</b>                                                                                        |
|                                           | SLO 1250 (epitype)     | Slovakia                       | KF154019        | KF154018        | Jančovičová et al. (2014)                                                                                |
|                                           | WU 31421               | Austria                        | KF879616        | -               | Jančovičová et al. (2014)                                                                                |
|                                           | WU 32709               | Austria                        | KF879615        | -               | Jančovičová et al. (2014)                                                                                |
| <i>C. malachius</i>                       | SLO 2552               | Slovakia                       | <b>OM832548</b> | <b>OM832578</b> | <b>This study</b>                                                                                        |
|                                           | SLO 1826               | Slovakia                       | <b>OM832539</b> | <b>OM832569</b> | <b>This study</b>                                                                                        |
|                                           | SLO 2548               | Slovakia                       | <b>OM832544</b> | <b>OM832577</b> | <b>This study</b>                                                                                        |
|                                           | SLO 2091               | Slovakia                       | <b>OM832541</b> | <b>OM832571</b> | <b>This study</b>                                                                                        |
|                                           | SLO 2540               | Slovakia                       | <b>OM832545</b> | <b>OM832574</b> | <b>This study</b>                                                                                        |
|                                           | SLO 2544               | Slovakia                       | <b>OM832547</b> | <b>OM832576</b> | <b>This study</b>                                                                                        |
|                                           | SLO 2530               | Slovakia                       | <b>OM832543</b> | <b>OM832573</b> | <b>This study</b>                                                                                        |
|                                           | SLO 2541               | Slovakia                       | <b>OM832546</b> | <b>OM832575</b> | <b>This study</b>                                                                                        |
|                                           | SLO 1845               | Russia (Republic of Tatarstan) | <b>OM832540</b> | <b>OM832570</b> | <b>This study</b>                                                                                        |
|                                           | SLO 2394               | Czech Republic                 | <b>OM832542</b> | <b>OM832572</b> | <b>This study</b>                                                                                        |
|                                           | SLO 1497               | Slovakia                       | MF621032        | -               | Jančovičová et al. (2017)                                                                                |
|                                           | SLO 479                | Slovakia                       | MF621033        | -               | Jančovičová et al. (2017)                                                                                |
|                                           | WU 29795               | Austria                        | KF879618        | -               | Jančovičová et al. (2014)                                                                                |
|                                           | IBL16                  | Poland                         | MZ410645        | -               | Rosa-Gruszecka, A.;<br>Hilszczanska, D.; Haidt, A.;<br>Tereba, A.; Wrobel, M.;<br>Stachyra, P. (unpubl.) |
| <i>C. malachius</i> var. <i>malachius</i> | MCA 343                | USA (Virginia)                 | -               | AF205674        | Aime (1999)                                                                                              |

|                                           |                        |                      |                 |                 |                                                       |
|-------------------------------------------|------------------------|----------------------|-----------------|-----------------|-------------------------------------------------------|
|                                           | MCA 775                | USA (North Carolina) | -               | AY029706        | Aime (2004)                                           |
| <i>C. malachius</i> var. <i>trichifer</i> | MCA 719                | Japan                | -               | AF367943        | Aime (2001)                                           |
| <i>C. martini</i>                         | MCA640                 | Japan                | -               | AF367944        | Aime, M.C. (unpubl.)                                  |
| <i>C. melleus</i>                         | MCA672                 | Japan                | -               | AF205702        | Aime (1999)                                           |
| <i>C. mollis</i>                          | DMS-9344564            | Denmark              | MT640263        | MT640263        | Leerhoei,F. and Langkjaer,E.M. (unpubl.)              |
|                                           | TUF120313              | Estonia              | UDB024710       | -               | <a href="https://unite.ut.ee">https://unite.ut.ee</a> |
|                                           | NL-3003                | Hungary              | -               | MK277890        | Varga et al. (2019)                                   |
| <i>C. nephrodes</i>                       | OKM 25896              | USA (Virginia)       | -               | AF205693        | Aime (1999)                                           |
|                                           | MCA 189                | USA (Virginia)       | -               | AF205670        | Aime (1999)                                           |
| <i>C. nyssicola</i>                       | TJB 8699               | USA (Maine)          | -               | AF205690        | Aime (1999)                                           |
| <i>C. palodensis</i>                      | TBGT16716 (holotype)   | India                | -               | MH310743        | Kumar et al. (2018a)                                  |
| <i>C. pini</i>                            | SLO 2579               | Slovakia             | <b>OM832550</b> | <b>OM832580</b> | <b>This study</b>                                     |
|                                           | SLO 2550               | Slovakia             | <b>OM832549</b> | <b>OM832579</b> | <b>This study</b>                                     |
|                                           | SLO 2601               | Slovakia             | <b>OM832551</b> | -               | <b>This study</b>                                     |
| <i>C. podocarp</i>                        | OKM27303               | Puerto Rico          | -               | AF205696        | Aime (1999)                                           |
| <i>C. pseudomollis</i>                    | HMJAU37125 (holotype)  | China                | NR173280        | -               | Ge & Bau (2020)                                       |
| <i>C. roseus</i>                          | TBGT15507              | India                | -               | MK567977        | Kumar et al. (2022)                                   |
| <i>C. rufidulus</i>                       | PDD 98272 (isotype)    | New Zealand          | NR159823        | -               | Horak (2018)                                          |
| <i>C. rufofloccosus</i>                   | PDD 72601 (holotype)   | New Zealand          | NR159822        | -               | Horak (2018)                                          |
| <i>C. sinuosus</i>                        | OKM26290               | USA                  | -               | AF367954        | Aime, M.C. (unpubl.)                                  |
| <i>Crepidotus</i> sp.                     | MCA 679                | Japan                | -               | AF367952        | Aime (2001)                                           |
|                                           | MCA 941                | Japan                | -               | AF367954        | Aime (2001)                                           |
|                                           | TNS B225               | Japan                | KF680278        | -               | Kasuya et al. (2014)                                  |
|                                           | TBGT15841              | India                | -               | MK567981        | Kumar, A.M.; Pradeep, C.K.; Vrinda, K.B. (unpubl.)    |
|                                           | MCA 442                | Puerto Rico          | -               | AF367950        | Aime (2004)                                           |
| <i>C. sphaerosporus</i>                   | OKM27013               | USA (Colorado)       | -               | AF205682        | Aime & Miller (2002)                                  |
| <i>C. stenocystis</i>                     | SLO 2557               | Slovakia             | <b>OM832553</b> | <b>OM832581</b> | <b>This study</b>                                     |
|                                           | SLO 481                | Slovakia             | <b>OM832552</b> | -               | <b>This study</b>                                     |
|                                           | PRM 911279 (holotype)  | Czech Republic       | MF621030        | MF621024        | Jančovičová et al. (2017)                             |
| <i>C. striatus</i>                        | HMJAU37076 (holotype)  | China                | NR173281        | -               | Ge & Bau (2020)                                       |
| <i>C. subverrucisporus</i>                | O-F-248331             | Norway               | UDB037991       | -               | <a href="https://unite.ut.ee">https://unite.ut.ee</a> |
| <i>C. tennesseensis</i>                   | TENN:029144 (holotype) | USA (Tennessee)      | NR119720        | -               | Schoch et al. (2014)                                  |
| <i>C. thermophilus</i>                    | TJB8496                | Puerto Rico          | -               | AF205691        | Aime et al. (2002)                                    |
| <i>C. tobolensis</i>                      | LE287655 (holotype)    | Russia               | NR174894        | MK560762        | Crous et al. (2019)                                   |
| <i>C. tortus</i>                          | TBGT17194 (holotype)   | India                | -               | MK462162        | Kumar et al. (2022)                                   |
| <i>C. trichocraspedotus</i>               | HMJAU37138 (holotype)  | China                | NR173282        | -               | Ge & Bau (2020)                                       |
| <i>C. uber</i>                            | MCA1403                | USA                  | -               | AF367961        | Aime, M.C. (unpubl.)                                  |
| <i>C. variabilis</i>                      | SLO 2018               | Slovakia             | MT055890        | <b>OM832583</b> | Jančovičová et al. (2020) / <b>This study</b>         |
|                                           | SLO 2021               | Slovakia             | MT055889        | <b>OM832585</b> | Jančovičová et al. (2020) / <b>This study</b>         |

|                              |                      |                 |          |                 |                                                               |
|------------------------------|----------------------|-----------------|----------|-----------------|---------------------------------------------------------------|
|                              | SLO 2016             | Slovakia        | MT055888 | <b>OM832582</b> | <b>study</b><br>Jančovičová et al. (2020) / <b>This study</b> |
|                              | SLO 2423             | Slovakia        | MT055887 | <b>OM832584</b> | Jančovičová et al. (2020) / <b>This study</b>                 |
| <i>C. versutus</i>           | IBNR1997/0962        | Russia          | -        | AF367958        | Aime, M.C. (unpubl.)                                          |
| <i>C. volubilis</i>          | TBGT15648 (holotype) | India           | -        | MH310742        | Kumar et al. (2018b)                                          |
| <i>Simocybe phlebophora</i>  | PBM3089              | New Zealand     | MK421963 | MK421967        | Matheny et al. (2020)                                         |
| <i>Simocybe rhabarbarina</i> | 4583-15              | Italy           | KT934412 | KT934415        | Poli et al. (2015)                                            |
| <i>Simocybe</i> sp.          | PBM3031              | USA (Tennessee) | GQ893023 | GQ892979        | Matheny et al. (2020)                                         |

#### References to Supplementary Table S2

Aime, M.C. Generic concepts in the Crepidotaceae as inferred from nuclear large subunit, ribosomal DNA sequences, morphology, and basidiospore dormancy patterns. MSc Thesis, Virginia Polytechnic Institute and State University, Blacksburg, USA (Virginia), 1999.

Aime, M.C. Biosystematic Studies in *Crepidotus* and the Crepidotaceae (Basidiomycetes, Agaricales). PhD Thesis, Virginia Polytechnic Institute and State University, Blacksburg, USA (Virginia), 2001.

Aime, M.C. Intercompatibility tests and phylogenetic analysis in the *Crepidotus Sphaerula* group complex: concordance between ICGs and nuclear rDNA sequences highlight phenotypic plasticity within Appalachian species. In Fungi in forest ecosystems: systematics, diversity, and ecology; Cripps, C.L. Ed.; New York Botanical Garden: New York, USA, 2004; pp. 71–92.

Aime, M.C.; Baroni, T.J.; Miller, O.K. *Crepidotus thermophilus* comb. nov., a reassessment of *Melanomphalia thermophila*, a rarely collected tropical agaric. Mycologia 2002, 94, 1059–1065.

Aime, M.C.; Miller, O.K. Delayed germination of basidiospores in temperate species of *Crepidotus* (Fr.) Staude. Can. J. Bot. 2002, 80, 280–287.

Aime, M.C.; Vilgalys, R.; Miller, O.K. The Crepidotaceae (Basidiomycota, Agaricales): phylogeny and taxonomy of the genera and revision of the family based on molecular evidence. Am. J. Bot. 2005, 92, 74–82.

Crous, P.W. et al. Fungal Planet description sheets: 868–950. Persoonia 2019, 42, 291–473

Ge, Y.P.; Bau, T. Descriptions of six new species of *Crepidotus* from China. Mycosystema. 2020, 39, 238–255.

Ge, Y.P.; Yang, S.S.; Bau, T. *Crepidotus lutescens* sp. nov. (Inocybaceae, Agaricales), an ochraceous salmon colored species from northeast of China. Phytotaxa 2017, 297, 189–196.

Guzmán-Dávalos L.; Pradeep C.K.; Vrinda K.B.; Kumar A.M.; RamírezCruz V.; Herrera M.; Villalobos-Arámbula A.R.; Soyong K.; Baroni T.J.; Aime M.C. A new stipitate species of *Crepidotus* from India and Thailand, with notes on other tropical species. Mycologia 2017, 109, 804–814.

Hofstetter, V.; Buyck, B.; Eyssartier, G.; Schnee, S.; Gindro, K. The unbearable lightness of sequenced-based identification. Fungal Diversity 2019, 96, 243–284.

Horak, E. Fungi of New Zealand. Volume 6. Agaricales (Basidiomycota) of New Zealand. 2. Brown spored genera p.p. *Crepidotus*, *Flammulaster*, *Inocybe*, *Phaeocollybia*, *Phaeomarasmius*, *Pleuroflammula*, *Pyrrhoglossum*, *Simocybe*, *Tubaria* and *Tympanella*. Westerdijk Biodiversity Series 2018, 16, 1–205.

Hughes, K.W.; Petersen, R.H.; Lickey, E.B. Using heterozygosity to estimate a percentage DNA sequence similarity for environmental species' delimitation across basidiomycete fungi. *New Phytologist* 2009, 182: 795–798.

Izhar, A.; Usman, M.; Khalid, A.N. *Crepidotus iqbalii* (Crepidotaceae, Agaricales) a new stipitate species, from Pakistan. *Phytotaxa* 2021, 500, 95–107.

Jančovičová, S.; Tomšovský, M.; Urban, A.; Krisai-Greilhuber, I. New records and epitypification of *Crepidotus malachoides* (Crepidotaceae, Agaricales). *Sydowia* 2014, 66, 79–97.

Jančovičová, S.; Adamčík, S.; Looney, B.P.; Caboň, M.; Čaplovičová, M.; Kopáni, M.; Pennycook, S.R.; Adamčíková, K. Delimitation of European *Crepidotus stenocystis* as different from the North American species *C. brunnescens* (Crepidotaceae, Agaricales). *Phytotaxa* 2017, 328, 127–139.

Jančovičová, S.; Adamčíková, K.; Caboň, M.; Adamčík, S. How variable is *Crepidotus variabilis*? *Phytotaxa* 2020, 449, 253–264.

Kasuya, T.; Uno, K.; Hosaka K. Reexamination of *Crepidotus crocophyllus* (Basidiomycota, Fungi) in Japan, with reference to its phylogenetic placement. *Univ. Bull. Chiba Inst. Sci* 2014, 7: 159–166.

Kim, C.S.; Jo, J.W.; Kwag, Y.N.; Sung, G.H.; Lee, S.G.; Kim, S.Y.; Shin, C.H.; Han, S.K. Mushroom flora of Ulleung-gun and a newly recorded *Bovista* species in the Republic of Korea. *Mycobiology* 2015, 43: 239–257.

Kumar, A.M.; Vrinda, K.B.; Pradeep, C.K. New and noteworthy crepidotoid agarics from India. *Cryptogam., Mycol* 2018a 39, 287–298.

Kumar, A.M.; Vrinda, K.B.; Pradeep, C.K. Two new species of *Crepidotus* (Basidiomycota, Agaricales) from peninsular India. *Phytotaxa* 2018b, 372, 67–78

Kumar, A.M.; Aime, M.C.; Vrinda, K.B.; Pradeep, C.K. Two new species and a new record of *Crepidotus* (Agaricomycetes) from India. *Aust. Systematic Bot.* 2020, 33, 380–391.

Kumar, A.M.; Pradeep, C.K.; Aime, M.C. New species and new records of *Crepidotus* (Crepidotaceae) from India. *Mycol. Prog.* 2022, 21, 311–326.

Liu L.-N., Razaq A., Atri N.S., Bau T., Belbahri L., Chenari Bouket A., Chen L.-P., Deng C., Ilyas S., Khalid A.N., Kitaura M.J., Kobayashi T., Li Y., Lorenz A.P., Ma Y.-H., Malysheva E., Malysheva V., Nuytink J., Qiao M., Saini M.K., Scur M.C., Sharma S., Shu L.-L., Spirin V., Tanaka Y., Tojo M., Uzuhashi S., Valério-Júnior C., Verbeken A., Verma B., Wu R.-H., Xu J.-P., Yu Z.-F., Zeng H., Zhang B., Banerjee A., Beddiar A., Bordallo J.J., Dafri A., Dima B., Krisai-Greilhuber I., Lorenzini M., Mandal R., Morte A., Nath P.S., Papp V., Pavlík J., Rodríguez A., Ševc̣íková H., Urban A., Voglmayr H. & Zapparoli G. (2018) Fungal Systematics and Evolution: FUSE 4. – *Sydowia* 70: 211–286.

Matheny, P.B. et al. Contributions of rpb2 and tef1 to the phylogeny of mushrooms and allies (Basidiomycota, Fungi). *Mol. Phylogenet. Evol.* 2007, 43, 430–451.

Matheny, P.B.; Hobbbs A.M.; Esteve-Raventós, F. Genera of Inocybaceae: New skin for the old ceremony. *Mycologia* 2020, 112: 83–120.

Moncalvo, J.-M.; Vilgalys, R.; Redhead, S.A.; Johnson, J.E.; James T.Y.; Aime, M.C.; Hofstetter, V.; Verduin, S.J.W.; Larsson, E.; Baroni, T.J.; Thorn, G.; Jacobsson, S.; Cl  men  on, H.; Miller, O.K. Jr. One hundred and seventeen clades of euagarics. Mol. Phylogenet. Evol. 2002, 23: 357–400.

Poli, L.; Musumeci, E.; Alvarado, P. A new European *Simocybe* discovered in (Brianza) Lombardia: *S. rhabarbarina* sp. nov. Boll Assoc Micol Ecol Romana 2015, 96: 20–30.

Porter, T.M.; Skillman, J.E.; Moncalvo, J.M. Fruiting body and soil rDNA sampling detects complementary assemblage of Agaricomycotina (Basidiomycota, Fungi) in a hemlock-dominated forest plot in southern Ontario. Mol. Ecol. 2008, 17, 3037–3050.

Schoch, C.L et al. 2014. Finding needles in haystacks: linking scientific names, reference specimens and molecular data for Fungi. Database 2014, bau061, 21 p.

Telfer et al. Biodiversity inventories in high gear: DNA barcoding facilitates a rapid biotic survey of a temperate nature reserve. Biodiversity Data Journal 2015, 3, e6313.

Varga et al. Megaphylogeny resolves global patterns of mushroom evolution. Nat Ecol Evol 2019, 3, 668–678.
