# Supplementary material for: Phylogeny of Crepidotus applanatus Look-Alikes Reveals a Convergent Morphology Evolution and a New Species C. pini
Source: MDPI journal article supplement (doi:10.3390/jof8050489), 2022-05-07
Supplement: s1 [file s1]

**Table S4:** Estimated ranges of cheilocystidia dimensions of the studied *Crepidotus* collections based on 30 measurements represented as average (underlined)  $\pm$  standard deviation. Morphological groups of cheilocystidia: cla – clavate, cyl – cylindrical, utr – utriform, ven – ventricose, for – forked, lob – lobate, pyr – pyriform, glo – globose (undifferentiated in all whether broadly or narrowly). Sequenced specimens marked with asterisk.

| Taxon                        | Collection number | Length ( $\mu\text{m}$ ) | Width ( $\mu\text{m}$ ) | Morphological groups |     |     |     |     |     |     |     |
|------------------------------|-------------------|--------------------------|-------------------------|----------------------|-----|-----|-----|-----|-----|-----|-----|
|                              |                   |                          |                         | cla                  | cyl | utr | ven | for | lob | pyr | glo |
| <i>Crepidotus applanatus</i> | SLO 1492*         | 24.9– <u>31.0</u> –37.1  | 7.2– <u>9.9</u> –12.6   | 20                   |     | 4   |     | 5   | 1   |     |     |
|                              | SLO 2551*         | 30.9– <u>35.0</u> –39.1  | 9.2– <u>10.5</u> –11.7  | 30                   |     |     |     |     |     |     |     |
|                              | SLO 2517          | 28.0– <u>33.3</u> –38.5  | 7.8– <u>9.2</u> –10.5   | 30                   |     |     |     |     |     |     |     |
|                              | SLO 1821*         | 29.0– <u>34.4</u> –39.7  | 10.5– <u>12.4</u> –14.4 | 30                   |     |     |     |     |     |     |     |
|                              | SLO 2524          | 31.3– <u>38.2</u> –45.1  | 8.8– <u>11.2</u> –13.5  | 28                   |     |     |     | 2   |     |     |     |
|                              | SLO 2523          | 29.7– <u>38.8</u> –47.9  | 9.9– <u>11.5</u> –13.2  | 30                   |     |     |     |     |     |     |     |
|                              | SLO 2534*         | 30.7– <u>38.1</u> –45.6  | 8.4– <u>9.7</u> –11.1   | 24                   |     | 2   |     | 2   | 2   |     |     |
|                              | SLO 2535          | 36.3– <u>43.0</u> –49.6  | 10.2– <u>12.1</u> –14.0 | 29                   |     | 1   |     |     |     |     |     |
|                              | SLO 2537*         | 32.7– <u>37.9</u> –43.1  | 8.8– <u>10.5</u> –12.2  | 22                   |     |     |     | 6   | 2   |     |     |
|                              | SLO 2538          | 26.7– <u>31.6</u> –36.4  | 7.2– <u>8.4</u> –9.5    | 24                   |     | 5   |     | 1   |     |     |     |
|                              | SLO 2539*         | 27.5– <u>33.2</u> –38.9  | 7.4– <u>8.9</u> –10.5   | 17                   |     |     | 9   |     |     | 4   |     |
|                              | SLO 2533*         | 28.9– <u>35.1</u> –41.2  | 8.1– <u>9.4</u> –10.7   | 14                   |     | 3   | 5   | 2   | 6   |     |     |
|                              | SLO 2545          | 30.5– <u>35.7</u> –40.9  | 8.2– <u>9.7</u> –11.2   | 25                   |     | 2   |     |     | 3   |     |     |
|                              | SLO 2525          | 34.3– <u>38.3</u> –42.2  | 8.1– <u>9.7</u> –11.3   | 30                   |     |     |     |     |     |     |     |
|                              | SLO 2528*         | 29.8– <u>34.0</u> –38.3  | 7.6– <u>8.9</u> –10.1   | 30                   |     |     |     |     |     |     |     |
|                              | SLO 2531          | 30.9– <u>37.9</u> –44.9  | 7.5– <u>8.6</u> –9.7    | 21                   |     | 5   | 4   |     |     |     |     |
|                              | SLO 2532          | 31.5– <u>37.0</u> –42.6  | 9.0– <u>10.2</u> –11.4  | 30                   |     |     |     |     |     |     |     |
|                              | SLO 2547*         | 35.0– <u>39.5</u> –44.0  | 8.7– <u>10.1</u> –11.5  | 29                   | 1   |     |     |     |     |     |     |
|                              | SLO 1926          | 27.2– <u>32.9</u> –38.6  | 5.5– <u>9.9</u> –14.2   | 28                   |     | 2   |     |     |     |     |     |
|                              | SLO 2581*         | 25.6– <u>30.6</u> –35.6  | 8.6– <u>10.0</u> –11.4  | 23                   |     | 3   | 1   | 2   | 1   |     |     |
| <i>Crepidotus malachius</i>  | SLO 2552*         | 30.3– <u>35.8</u> –41.4  | 9.7– <u>11.0</u> –12.2  | 27                   |     |     | 3   |     |     |     |     |
|                              | SLO 1497*         | 27.5– <u>33.5</u> –39.6  | 9.2– <u>10.6</u> –12.0  | 26                   |     |     | 3   | 1   |     |     |     |
|                              | SLO 1826*         | 23.0– <u>29.1</u> –35.2  | 8.2– <u>9.2</u> –10.2   | 29                   |     |     |     |     | 1   |     |     |
|                              | SLO 2548*         | 25.9– <u>31.1</u> –36.3  | 9.3– <u>12.6</u> –15.9  | 7                    |     |     | 11  |     |     | 5   | 7   |
|                              | SLO 479*          | 31.5– <u>39.6</u> –47.8  | 8.9– <u>10.2</u> –11.6  | 24                   |     |     | 3   | 3   |     |     |     |
|                              | SLO 2091*         | 28.5– <u>32.3</u> –36.1  | 8.8– <u>10.0</u> –11.1  | 26                   |     | 2   | 2   |     |     |     |     |
|                              | SLO 2536          | 27.2– <u>32.2</u> –37.2  | 9.0– <u>10.5</u> –12.0  | 30                   |     |     |     |     |     |     |     |
|                              | SLO 2540*         | 21.5– <u>24.5</u> –27.5  | 7.7– <u>8.9</u> –10.1   | 22                   | 1   | 5   | 2   |     |     |     |     |
|                              | SLO 2546          | 31.5– <u>36.4</u> –41.4  | 8.7– <u>10.1</u> –11.5  | 30                   |     |     |     |     |     |     |     |
|                              | SLO 2544*         | 26.5– <u>32.7</u> –38.9  | 8.6– <u>9.7</u> –10.8   | 30                   |     |     |     |     |     |     |     |
|                              | SLO 2542          | 24.9– <u>30.8</u> –36.7  | 8.6– <u>9.8</u> –11.0   | 28                   |     |     | 2   |     |     |     |     |
|                              | SLO 2530*         | 24.5– <u>28.3</u> –32.1  | 8.4– <u>10.3</u> –12.1  | 30                   |     |     |     |     |     |     |     |
|                              | SLO 2526          | 29.3– <u>33.9</u> –38.6  | 8.1– <u>9.3</u> –10.5   | 30                   |     |     |     |     |     |     |     |
|                              | SLO 2527          | 29.3– <u>32.5</u> –35.7  | 8.6– <u>9.5</u> –10.4   | 29                   |     | 1   |     |     |     |     |     |
|                              | SLO 2529          | 32.1– <u>36.9</u> –41.6  | 8.9– <u>9.7</u> –10.5   | 30                   |     |     |     |     |     |     |     |
|                              | SLO 2518          | 26.4– <u>31.5</u> –36.5  | 7.6– <u>8.7</u> –9.7    | 29                   |     | 1   |     |     |     |     |     |
|                              | SLO 2519          | 29.4– <u>38.2</u> –47.0  | 9.6– <u>11.4</u> –13.1  | 29                   |     | 1   |     |     |     |     |     |
|                              | SLO 2520          | 27.6– <u>33.8</u> –40.1  | 8.5– <u>9.5</u> –10.5   | 29                   |     |     | 1   |     |     |     |     |
|                              | SLO 2541*         | 25.3– <u>28.9</u> –32.5  | 8.1– <u>9.0</u> –9.8    | 25                   | 1   | 2   | 2   |     |     |     |     |
|                              | SLO 1845*         | 28.6– <u>32.9</u> –37.3  | 8.0– <u>9.2</u> –10.4   | 25                   | 1   | 2   | 2   |     |     |     |     |
|                              | SLO 2394*         | 25.0– <u>29.0</u> –33.0  | 8.6– <u>10.2</u> –11.7  | 28                   |     | 1   | 1   |     |     |     |     |
|                              | SLO 2549          | 27.6– <u>31.7</u> –35.8  | 8.8– <u>9.8</u> –10.8   | 27                   |     |     | 3   |     |     |     |     |
| <i>Crepidotus pini</i>       | SLO 2550*         | 36.0– <u>43.0</u> –52.0  | 7.8– <u>9.1</u> –10.4   | 26                   |     | 4   |     |     |     |     |     |
|                              | SLO 2601*         | 32.5– <u>40.5</u> –48.5  | 8.8– <u>9.8</u> –10.9   | 24                   |     | 4   |     | 2   |     |     |     |
|                              | SLO 2602          | 38.5– <u>45.9</u> –53.2  | 8.5– <u>10.2</u> –11.9  | 20                   |     | 4   |     | 1   | 5   |     |     |
|                              | SLO 2579*         | 38.8– <u>45.7</u> –52.6  | 9.4– <u>10.6</u> –11.7  | 21                   | 1   | 2   |     | 2   | 4   |     |     |
|                              | SLO 2622          | 33.5– <u>40.5</u> –47.5  | 9.3– <u>10.3</u> –11.3  | 26                   |     | 4   |     |     |     |     |     |
|                              | SLO 2623          | 31.2– <u>39.0</u> –46.7  | 9.5– <u>10.6</u> –11.6  | 28                   |     | 2   |     |     |     |     |     |
