# Supplementary material for: Phylogeny of Crepidotus applanatus Look-Alikes Reveals a Convergent Morphology Evolution and a New Species C. pini
Source: MDPI journal article supplement (doi:10.3390/jof8050489), 2022-05-07
Supplement: s1 [file s1]

**Table S3:** Estimated ranges of basidiospore dimensions of the studied *Crepidotus* collections based on 30 measurements represented as average (underlined)  $\pm$  standard deviation, in parenthesis minimum and maximum values, Q = length/width ratio. Sequenced specimens are marked with asterisk.

| Taxon                        | Collection number | Length ( $\mu\text{m}$ )       | Width ( $\mu\text{m}$ )        | Q                       |
|------------------------------|-------------------|--------------------------------|--------------------------------|-------------------------|
| <i>Crepidotus applanatus</i> | SLO 1492*         | (4.8)4.9– <u>5.2</u> –5.5(6.2) | (4.5)4.8– <u>5.1</u> –5.5(6.2) | 0.99– <u>1.01</u> –1.03 |
|                              | SLO 2551*         | (4.8)4.8– <u>5.2</u> –5.7(6.8) | (4.8)4.8– <u>5.2</u> –5.6(6.8) | 0.99– <u>1.00</u> –1.02 |
|                              | SLO 2517          | (4.8)4.8– <u>5.0</u> –5.2(5.8) | (4.8)4.8– <u>5.0</u> –5.3(5.8) | 0.98– <u>1.00</u> –1.02 |
|                              | SLO 1821*         | (4.8)4.9– <u>5.1</u> –5.3(5.7) | (4.8)4.9– <u>5.1</u> –5.3(5.7) | 0.98– <u>1.00</u> –1.03 |
|                              | SLO 2524          | (5.0)4.9– <u>5.3</u> –5.6(6.0) | (5.0)4.9– <u>5.2</u> –5.6(6.0) | 0.99– <u>1.00</u> –1.02 |
|                              | SLO 2523          | (4.5)4.7– <u>5.1</u> –5.5(6.5) | (4.5)4.7– <u>5.1</u> –5.4(6.5) | 0.99– <u>1.00</u> –1.02 |
|                              | SLO 2534*         | (4.8)4.8– <u>5.1</u> –5.4(6.0) | (4.8)4.8– <u>5.1</u> –5.4(6.0) | 0.98– <u>1.01</u> –1.03 |
|                              | SLO 2535          | (4.8)5.0– <u>5.2</u> –5.5(6.0) | (4.8)5.0– <u>5.2</u> –5.5(6.0) | 0.99– <u>1.00</u> –1.01 |
|                              | SLO 2537*         | (4.5)4.8– <u>5.1</u> –5.4(6.0) | (4.5)4.8– <u>5.1</u> –5.3(5.8) | 0.99– <u>1.00</u> –1.02 |
|                              | SLO 2538          | (4.8)4.9– <u>5.2</u> –5.4(6.0) | (4.8)4.9– <u>5.1</u> –5.4(6.0) | 0.99– <u>1.00</u> –1.02 |
|                              | SLO 2539*         | (4.5)4.8– <u>5.2</u> –5.5(6.0) | (4.5)4.8– <u>5.2</u> –5.5(6.0) | 0.98– <u>1.00</u> –1.02 |
|                              | SLO 2533*         | (4.8)4.9– <u>5.2</u> –5.4(5.8) | (4.8)4.9– <u>5.1</u> –5.4(5.8) | 0.99– <u>1.00</u> –1.02 |
|                              | SLO 2545          | (4.5)4.8– <u>5.2</u> –5.7(6.2) | (4.5)4.8– <u>5.2</u> –5.7(6.2) | 0.99– <u>1.00</u> –1.02 |
|                              | SLO 2525          | (5.0)5.0– <u>5.4</u> –5.8(6.2) | (4.8)4.9– <u>5.3</u> –5.8(6.2) | 0.99– <u>1.00</u> –1.02 |
|                              | SLO 2528*         | (4.2)4.6– <u>5.0</u> –5.4(5.8) | (4.2)4.6– <u>5.0</u> –5.4(5.8) | 0.99– <u>1.00</u> –1.06 |
|                              | SLO 2531          | (4.5)4.7– <u>5.0</u> –5.2(5.5) | (4.5)4.6– <u>5.0</u> –5.2(5.5) | 0.98– <u>1.01</u> –1.03 |
|                              | SLO 2532          | (4.5)4.8– <u>5.1</u> –5.4(6.0) | (4.5)4.8– <u>5.1</u> –5.4(5.8) | 0.99– <u>1.00</u> –1.02 |
|                              | SLO 2547*         | (4.8)5.0– <u>5.3</u> –5.6(6.0) | (4.8)5.0– <u>5.3</u> –5.5(6.0) | 0.99– <u>1.00</u> –1.01 |
|                              | SLO 1926          | (4.8)4.9– <u>5.4</u> –5.9(6.2) | (4.8)4.9– <u>5.3</u> –5.8(6.0) | 0.99– <u>1.02</u> –1.05 |
|                              | SLO 2581*         | (4.5)4.9– <u>5.4</u> –5.9(6.8) | (4.5)4.9– <u>5.3</u> –5.8(6.8) | 0.99– <u>1.00</u> –1.02 |
| <i>Crepidotus malachius</i>  | SLO 2552*         | (5.2)6.2– <u>6.8</u> –7.4(8.0) | (5.2)6.1– <u>6.7</u> –7.3(8.0) | 0.99– <u>1.01</u> –1.02 |
|                              | SLO 1497*         | (5.2)6.0– <u>6.7</u> –7.4(8.0) | (5.2)6.0– <u>6.6</u> –7.3(8.0) | 0.99– <u>1.01</u> –1.01 |
|                              | SLO 1826*         | (5.8)5.9– <u>6.5</u> –7.1(9.0) | (5.8)5.9– <u>6.5</u> –7.1(9.0) | 0.99– <u>1.00</u> –1.01 |
|                              | SLO 2548*         | (5.8)6.4– <u>7.1</u> –7.7(9.0) | (5.8)6.3– <u>7.1</u> –7.8(9.0) | 0.98– <u>1.00</u> –1.02 |
|                              | SLO 479*          | (5.2)5.6– <u>6.6</u> –7.6(9.5) | (5.2)5.6– <u>6.6</u> –7.7(9.5) | 0.99– <u>1.00</u> –1.01 |
|                              | SLO 2091*         | (5.5)5.9– <u>6.6</u> –7.3(8.2) | (5.5)6.0– <u>6.6</u> –7.3(8.2) | 0.98– <u>1.00</u> –1.02 |
|                              | SLO 2536          | (5.5)6.3– <u>6.8</u> –7.3(8.0) | (5.5)6.2– <u>6.8</u> –7.3(8.0) | 0.99– <u>1.00</u> –1.01 |
|                              | SLO 2540*         | (5.0)5.8– <u>6.5</u> –7.1(8.2) | (5.0)5.8– <u>6.4</u> –7.1(8.0) | 0.99– <u>1.01</u> –1.02 |
|                              | SLO 2546          | (5.0)5.8– <u>6.7</u> –7.5(8.5) | (5.0)5.8– <u>6.7</u> –7.6(9.0) | 0.98– <u>1.00</u> –1.02 |
|                              | SLO 2544*         | (5.5)5.9– <u>6.6</u> –7.2(9.0) | (5.5)5.9– <u>6.5</u> –7.2(9.0) | 0.99– <u>1.00</u> –1.01 |
|                              | SLO 2542          | (5.0)6.0– <u>6.9</u> –7.8(9.0) | (5.0)6.0– <u>6.9</u> –7.8(9.0) | 0.99– <u>1.00</u> –1.01 |
|                              | SLO 2530*         | (6.0)6.4– <u>6.9</u> –7.5(8.0) | (6.0)6.4– <u>6.9</u> –7.4(8.0) | 0.99– <u>1.00</u> –1.02 |
|                              | SLO 2526          | (5.0)5.7– <u>6.6</u> –7.5(9.0) | (5.0)5.7– <u>6.6</u> –7.5(9.0) | 0.99– <u>1.00</u> –1.02 |
|                              | SLO 2527          | (5.0)6.0– <u>6.7</u> –7.3(8.0) | (5.0)6.0– <u>6.7</u> –7.3(8.0) | 0.98– <u>1.00</u> –1.02 |
|                              | SLO 2529          | (5.0)5.7– <u>6.4</u> –7.1(8.0) | (5.2)5.7– <u>6.3</u> –7.0(8.0) | 0.99– <u>1.00</u> –1.02 |
|                              | SLO 2518          | (5.0)5.5– <u>6.4</u> –7.4(9.0) | (5.0)5.5– <u>6.4</u> –7.3(9.0) | 0.99– <u>1.01</u> –1.02 |
|                              | SLO 2519          | (5.8)6.2– <u>6.7</u> –7.2(8.0) | (5.8)6.1– <u>6.6</u> –7.2(8.0) | 0.99– <u>1.00</u> –1.02 |
|                              | SLO 2520          | (5.5)6.1– <u>6.7</u> –7.3(7.8) | (5.5)6.0– <u>6.6</u> –7.2(7.8) | 0.99– <u>1.00</u> –1.02 |
|                              | SLO 2541*         | (5.2)6.0– <u>6.4</u> –6.9(7.2) | (5.2)6.0– <u>6.4</u> –6.8(7.2) | 0.99– <u>1.01</u> –1.02 |
|                              | SLO 1845*         | (5.2)5.8– <u>6.4</u> –6.9(7.2) | (5.2)5.8– <u>6.3</u> –6.9(7.2) | 0.98– <u>1.01</u> –1.03 |
| <i>Crepidotus pini</i>       | SLO 2394*         | (5.5)5.9– <u>6.7</u> –7.6(9.2) | (5.5)5.9– <u>6.7</u> –7.5(9.0) | 0.99– <u>0.99</u> –1.02 |
|                              | SLO 2549          | (5.5)6.0– <u>6.8</u> –7.7(9.0) | (5.2)6.0– <u>6.8</u> –7.6(9.0) | 0.99– <u>1.01</u> –1.02 |
|                              | SLO 2550*         | (4.8)5.1– <u>5.6</u> –6.1(6.5) | (4.8)5.1– <u>5.5</u> –6.0(6.5) | 0.99– <u>1.01</u> –1.04 |
|                              | SLO 2601*         | (5.2)5.4– <u>5.8</u> –6.1(6.8) | (5.2)5.3– <u>5.7</u> –6.0(6.5) | 0.98– <u>1.02</u> –1.06 |
|                              | SLO 2602          | (5.0)5.3– <u>5.8</u> –6.1(7.0) | (5.0)5.3– <u>5.7</u> –6.1(6.8) | 0.99– <u>1.01</u> –1.03 |
|                              | SLO 2579*         | (5.0)5.5– <u>6.0</u> –6.5(7.0) | (5.0)5.4– <u>5.9</u> –6.5(7.0) | 0.99– <u>1.01</u> –1.02 |
|                              | SLO 2622          | (4.8)5.3– <u>5.8</u> –6.3(6.8) | (4.8)5.3– <u>5.7</u> –6.1(6.5) | 0.98– <u>1.02</u> –1.05 |
|                              | SLO 2623          | (4.8)5.1– <u>5.5</u> –5.9(6.2) | (4.8)5.0– <u>5.4</u> –5.8(6.0) | 0.99– <u>1.01</u> –1.04 |
