# Supplementary material for: Phylogeny of Crepidotus applanatus Look-Alikes Reveals a Convergent Morphology Evolution and a New Species C. pini
Source: MDPI journal article supplement (doi:10.3390/jof8050489), 2022-05-07
Supplement: s1 [file s1]

**Table S1:** Details on the studied specimens of *Crepidotus* (arranged within Slovakia from west to east). Specimens with asterisk symbol were sequenced.

| Taxon                        | Collection number | Country, region/area                     | Locality                                                                                                            | Habitat                                                                      | Substrate                                                                           | Coordinates            | Elevation (m a.s.l.) | Date, collector            |
|------------------------------|-------------------|------------------------------------------|---------------------------------------------------------------------------------------------------------------------|------------------------------------------------------------------------------|-------------------------------------------------------------------------------------|------------------------|----------------------|----------------------------|
| <i>Crepidotus applanatus</i> | SLO 1492*         | <b>Slovakia</b> , Kremnické vrchy Mts.   | Badín village, ca. 5 km NW of the church, the National Nature Reserve Badínsky prales                               | old growth forest of <i>Fagus sylvatica</i> , <i>Abies alba</i>              | on wood of fallen trunk of <i>Fagus sylvatica</i> , 4 <sup>th</sup> decay stage     | 48°41'12"N, 19°03'07"E | 750                  | 9.IX.2015, S. Jančovičová  |
|                              | SLO 2551*         | <b>Slovakia</b> , Veľká Fatra Mts.       | Dolný Harmanec village, ca. 3.5 km NNW of the church, Rabkina skala rock                                            | forest of <i>Fagus sylvatica</i> and mixed beech forest                      | on wood of fallen trunk of deciduous tree, 4 <sup>th</sup> decay stage              | 48°50'29"N, 19°02'30"E | 900                  | 28.IX.2004, S. Adamčík     |
|                              | SLO 2517          | <b>Slovakia</b> , Vihorlatské vrchy Mts. | Jovsa village, ca. 1.5 km NE of the church, the National Nature Reserve Jovsianska hrabina                          | forest of <i>Carpinus betulus</i> , <i>Quercus robur</i> , <i>Q. petraea</i> | on wood of fallen trunk of <i>Quercus</i> , 4 <sup>th</sup> decay stage             | 48°49'22"N, 22°06'27"E | 170                  | 18.IX.2001, S. Jančovičová |
|                              | SLO 1821*         | <b>Slovakia</b> , Vihorlatské vrchy Mts. | Valaškovce military district, ca. 4 km SE of the former village of Valaškovce, the National Nature Reserve Vihorlat | forest of <i>Fagus sylvatica</i> and mixed beech forest                      | on wood of fallen trunk of <i>Fagus sylvatica</i> , 4 <sup>th</sup> decay stage     | 48°53'22"N, 22°06'51"E | 850                  | 27.IX.2011, S. Jančovičová |
|                              | SLO 2524          | <b>Slovakia</b> , Vihorlatské vrchy Mts. | Zemplínske Hámre village, ca. 4 km S of the church, N edge of the peatbog Hypkania                                  | forest of <i>Fagus sylvatica</i> and mixed beech forest                      | on wood of fallen trunk of <i>Fagus sylvatica</i> , 4 <sup>th</sup> decay stage     | 48°54'51"N, 22°09'29"E | 830                  | 17.IX.2003, S. Jančovičová |
|                              | SLO 2523          | <b>Slovakia</b> , Vihorlatské vrchy Mts. | Zemplínske Hámre village, ca. 3.5 km SEE of the church                                                              | forest of <i>Fagus sylvatica</i> and mixed beech forest                      | on wood of fallen trunk of <i>Acer pseudoplatanus</i> , 3 <sup>rd</sup> decay stage | 48°55'11"N, 22°09'44"E | 800                  | 20.IX.2001, J. Vátava      |
|                              | SLO 2534*         | <b>Slovakia</b> , Vihorlatské vrchy Mts. | Remetské Hámre village, ca. 8 km N of the church, the Nature Reserve Jedlinka                                       | forest of <i>Fagus sylvatica</i> , <i>Abies alba</i>                         | on wood of fallen trunk of <i>Fagus sylvatica</i> , 4 <sup>th</sup> decay stage     | 48°54'51"N, 22°10'49"E | 800                  | 19.IX.2003, S. Jančovičová |
|                              | SLO 2535          | <b>Slovakia</b> , Vihorlatské vrchy Mts. | Remetské Hámre village, ca. 8 km N of the church, the Nature Reserve Jedlinka                                       | forest of <i>Fagus sylvatica</i> , <i>Abies alba</i>                         | on wood of fallen trunk of <i>Fagus sylvatica</i> , 4 <sup>th</sup> decay stage     | 48°54'51"N, 22°10'49"E | 800                  | 19.IX.2003, S. Jančovičová |
|                              | SLO 2537*         | <b>Slovakia</b> , Vihorlatské vrchy Mts. | Remetské Hámre village, ca. 8 km N of the church, the Nature Reserve Jedlinka                                       | forest of <i>Fagus sylvatica</i> , <i>Abies alba</i>                         | on wood of fallen trunk of <i>Fagus sylvatica</i> , 4 <sup>th</sup> decay stage     | 48°54'51"N, 22°10'49"E | 800                  | 19.IX.2003, S. Jančovičová |
|                              | SLO 2538          | <b>Slovakia</b> , Vihorlatské vrchy Mts. | Remetské Hámre village, ca. 8 km N of the church, the Nature Reserve Jedlinka                                       | forest of <i>Fagus sylvatica</i> , <i>Abies alba</i>                         | on wood of fallen trunk of <i>Fagus sylvatica</i> , 4 <sup>th</sup> decay stage     | 48°54'51"N, 22°10'49"E | 800                  | 19.IX.2003, S. Jančovičová |
|                              | SLO 2539*         | <b>Slovakia</b> , Vihorlatské vrchy Mts. | Remetské Hámre village, ca. 8 km N of the church, the Nature Reserve Jedlinka                                       | forest of <i>Fagus sylvatica</i> , <i>Abies alba</i>                         | on wood of fallen trunk of <i>Fagus sylvatica</i> , 4 <sup>th</sup> decay stage     | 48°54'51"N, 22°10'49"E | 800                  | 19.IX.2003, S. Jančovičová |
|                              | SLO 2533*         | <b>Slovakia</b> , Vihorlatské vrchy Mts. | Remetské Hámre village, ca. 7.5 km N of the church, the Nature Monument Malé Morské oko                             | forest of <i>Fagus sylvatica</i> , <i>Abies alba</i>                         | on wood of fallen trunk of <i>Fagus sylvatica</i> , 4 <sup>th</sup> decay stage     | 48°54'45"N, 22°10'59"E | 750                  | 19.IX.2003, S. Jančovičová |
|                              | SLO 2545          | <b>Slovakia</b> ,                        | Remetské Hámre village, ca. 1 km                                                                                    | acidophilous <i>Fagus sylvatica</i>                                          | on wood of fallen trunk of                                                          | 48°50'54"N             | 300–350              | 19.IX.2001,                |

|                                |           |                                               |                                                                                            |                                                                                                                                    |                                                                                   |                            |     |                             |
|--------------------------------|-----------|-----------------------------------------------|--------------------------------------------------------------------------------------------|------------------------------------------------------------------------------------------------------------------------------------|-----------------------------------------------------------------------------------|----------------------------|-----|-----------------------------|
|                                |           | Vihorlatské vrchy Mts.                        | E of the church, the Nature Reserve Machnatý vrch                                          | forest                                                                                                                             | <i>Fagus sylvatica</i> , 4 <sup>th</sup> decay stage                              | 22°11'24"E                 |     | S. Jančovičová              |
|                                | SLO 2525  | <b>Slovakia</b> , Vihorlatské vrchy Mts.      | Remetské Hámre village, ca. 8 km NNE of the church, the National Nature Reserve Morské oko | forest of <i>Fagus sylvatica</i> , <i>Abies alba</i>                                                                               | on wood of standing trunk of <i>Fagus sylvatica</i> , 4 <sup>th</sup> decay stage | 48°54'54"N, 22°12'06"E     | 650 | 12.VII.2001, S. Jančovičová |
|                                | SLO 2528* | <b>Slovakia</b> , Vihorlatské vrchy Mts.      | Remetské Hámre village, ca. 8 km NNE of the church, the National Nature Reserve Morské oko | forest of <i>Fagus sylvatica</i> , <i>Abies alba</i>                                                                               | on wood of fallen trunk of <i>Fagus sylvatica</i> , 4 <sup>th</sup> decay stage   | 48°54'54"N, 22°12'06"E     | 650 | 12.VII.2001, S. Jančovičová |
|                                | SLO 2531  | <b>Slovakia</b> , Vihorlatské vrchy Mts.      | Remetské Hámre village, ca. 8 km NNE of the church, the National Nature Reserve Morské oko | forest of <i>Fagus sylvatica</i> , <i>Abies alba</i>                                                                               | on wood of fallen branch of <i>Fagus sylvatica</i> , 3 <sup>rd</sup> decay stage  | 48°54'54"N, 22°12'06"E     | 650 | 12.VII.2001, S. Jančovičová |
|                                | SLO 2532  | <b>Slovakia</b> , Vihorlatské vrchy Mts.      | Remetské Hámre village, ca. 8 km NNE of the church, the National Nature Reserve Morské oko | forest of <i>Fagus sylvatica</i> , <i>Abies alba</i>                                                                               | on wood of fallen trunk of <i>Fagus sylvatica</i> , 4 <sup>th</sup> decay stage   | 48°54'54"N, 22°12'06"E     | 650 | 12.VII.2001, S. Jančovičová |
|                                | SLO 2547* | <b>Slovakia</b> , Vihorlatské vrchy Mts.      | Strihovce village, ca. 1.5 km SW of the church                                             | forest of <i>Betula pendula</i> , <i>Populus tremula</i> , <i>Salix caprea</i>                                                     | on wood of fallen trunk of <i>Salix</i> , 4 <sup>th</sup> decay stage             | 48°53'52"N, 22°15'31"E     | 550 | 18.IX.2003, S. Jančovičová  |
|                                | SLO 1926  | <b>Slovakia</b> , Bukovské vrchy Mts.         | Nová Sedlica village, ca. 3 km NNE of the church, the National Nature Reserve Stužica      | old growth forest of <i>Fagus sylvatica</i> , <i>Abies alba</i>                                                                    | on wood of fallen trunk of <i>Fagus sylvatica</i> , 4 <sup>th</sup> decay stage   | 49°04'42"N, 22°32'07"E     | 750 | 6.X.2016, S. Jančovičová    |
|                                | SLO 2581* | <b>Norway</b> , Trøndelag county              | Flatanger village, Stordalen                                                               | boreal rain forest of <i>Picea abies</i>                                                                                           | on wood of fallen trunk of cf. <i>Picea abies</i> , 4 <sup>th</sup> decay stage   | 64°26'39"N, 10°58'12"E     | 60  | 4.IX.2009, V. Kučera        |
| <i>Crepidotus crocophyllus</i> | SLO 2588* | <b>Slovakia</b> , Záhorská nížina Lowland     | Malé Leváre village, ca. 3 km SW of the church, in the alluvium of the Morava River        | mixed oak-elm-ash alluvial forest; <i>Quercus robur</i> , <i>Ulmus</i> , <i>Fraxinus</i>                                           | on wood of fallen trunk of deciduous tree, 4 <sup>th</sup> decay stage            | 48°31'12"N, 16°56'39"E     | 150 | 7.V.2004, S. Jančovičová    |
|                                | SLO 2433* | <b>Slovakia</b> , Záhorská nížina Lowland     | Záhorie military district, Hlboké village, ca. 100 m NE of the hunters' cottage Šranek     | forest of <i>Quercus robur</i> , <i>Pinus sylvestris</i> , <i>Betula pendula</i>                                                   | on wood of fallen trunk of deciduous tree, 4 <sup>th</sup> decay stage            | 48°38'23"N, 17°21'15"E     | 200 | 27.V.2019, S. Jančovičová   |
|                                | SLO 2590* | <b>Slovakia</b> , Devínska Kobyla Hills       | Bratislava city, the borough of Devín, the Fialková dolina Nature Reserve                  | forest of <i>Acer campestre</i> , <i>A. platanoides</i> , <i>A. pseudoplatanus</i> , <i>Tilia cordata</i> , <i>T. platyphyllos</i> | on wood of fallen trunk of <i>Tilia</i> , 4 <sup>th</sup> decay stage             | 48°10'10.8"N, 17°00'19.6"E | 195 | 15.VI.2007, S. Jančovičová  |
|                                | SLO 2553* | <b>USA, North Carolina</b> , Appalachian Mts. | SSW of the Asheville city, the Pisgah National Forest, the Bent Creek Experimental Forest  | upland hardwood forest                                                                                                             | on wood of fallen branch of deciduous tree, 4 <sup>th</sup> decay stage           | 35°28'36"N, 82°39'47"W     | 900 | 16.VII.2004, S. Adamčík     |
| <i>Crepidotus ehrendorferi</i> | SLO 2558* | <b>Slovakia</b> , Biele Karpaty Mts.          | Nová Bošáca village, ca. 1.5 km NNE of the church, the Nature Monument Grúň                | forest of <i>Quercus</i> , <i>Carpinus betulus</i> , <i>Fagus sylvatica</i>                                                        | on wood of stump of <i>Carpinus betulus</i> , 3 <sup>rd</sup> decay stage         | 48°53'39"N, 17°47'57"E     | 440 | 18.X.2001, S. Jančovičová   |
|                                | SLO 2587* | <b>Slovakia</b> , Považský Inovec Mts.        | Moravany nad Váhom village, ca. 250 m SEE of the recreation centre Výtoky                  | forest of <i>Fraxinus excelsior</i> , <i>Acer</i> , <i>Carpinus betulus</i>                                                        | on wood of fallen branch of deciduous tree, 3 <sup>rd</sup> decay stage           | 48°36'09"N, 17°56'14"E     | 300 | 29.IX.2012, J. Červenka     |
|                                | SLO 707*  | <b>Slovakia</b> , Zvolenská kotlina Basin     | Zvolen city, ca. 3 km N of the city centre, Borová hora Arboretum                          | forest of <i>Tilia cordata</i> , <i>Quercus robur</i> , <i>Acer campestre</i>                                                      | on wood of fallen branch of <i>Tilia cordata</i> , 3 <sup>rd</sup> decay stage    | 48°35'56"N, 19°08'01"E     | 300 | 28.IX.2009, S. Glejdura     |

|                               |           |                                                     |                                                                                       |                                                                                                        |                                                                                      |                             |         |                             |
|-------------------------------|-----------|-----------------------------------------------------|---------------------------------------------------------------------------------------|--------------------------------------------------------------------------------------------------------|--------------------------------------------------------------------------------------|-----------------------------|---------|-----------------------------|
| <i>Crepidotus malachoides</i> | SLO 2578* | <b>Slovakia,</b><br>Podunajská nížina Lowland       | Bratislava city, the borough of Petržalka, ca. 1 km SE of the Lafranconi bridge       | mixed ash-alder alluvial forest; <i>Pouulus nigra</i> , <i>Salix alba</i> , <i>Fraxinus</i>            | on wood of fallen trunk of <i>Fraxinus excelsior</i> , 4 <sup>th</sup> decay stage   | 48°07'49.5"N, 17°04'58.7"E  | 140     | 21.IX.2020, S. Jančovičová  |
|                               | SLO 2391* | <b>Slovakia,</b><br>Východoslovenská nížina Lowland | Malé Raškovce village, ca. 2 km SE of the church, the Nature Reserve Raškovský luh    | mixed oak-elm-ash alluvial forest; <i>Quercus robur</i> , <i>Acer campestre</i> , <i>Populus nigra</i> | on wood of fallen trunk of <i>Ulmus</i> , 4 <sup>th</sup> decay stage                | 48°34'0.65"N, 21°56'28.04"E | 100     | 28.V.2018, M. Lazor         |
|                               | SLO 2561* | <b>Slovakia,</b><br>Slanské vrchy Mts.              | Slanská Huta village, ca. 2 km SW of the church, the Nature Reserve Marocká hoľa      | old growth forest of <i>Fagus sylvatica</i>                                                            | on wood of fallen trunk of <i>Fagus sylvatica</i> , 4 <sup>th</sup> decay stage      | 48°35'23"N, 21°26'34"E      | 600     | 26.V.2019, M. Lazor         |
|                               | SLO 1932* | <b>Slovakia,</b><br>Bukovské vrchy Mts.             | Nová Sedlica village, ca. 3 km NNE of the church, the National Nature Reserve Stužica | old growth forest of <i>Fagus sylvatica</i> , <i>Abies alba</i>                                        | on wood of fallen trunk of <i>Fagus sylvatica</i> , 4 <sup>th</sup> decay stage      | 49°04'42"N, 22°32'07"E      | 750     | 6.X.2016, I. Tomášeková     |
| <i>Crepidotus malachius</i>   | SLO 2552* | <b>Slovakia,</b><br>Malé Karpaty Mts.               | Sološnica village, ca. 3.5 km SE of the church, Sološnická dolina valley              | forest of <i>Fagus sylvatica</i> and mixed beech forest                                                | on wood of fallen trunk of <i>Acer campestre</i> , 3 <sup>rd</sup> decay stage       | 48°26'47"N, 17°15'33"E      | 300     | 15.VII.2010, V. Kučera      |
|                               | SLO 1497* | <b>Slovakia,</b><br>Kremnické vrchy Mts.            | Badín village, ca. 5 km NW of the church, the National Nature Reserve Badínsky prales | old growth forest of <i>Fagus sylvatica</i> , <i>Abies alba</i>                                        | on wood of fallen trunk of <i>Fagus sylvatica</i> , 4 <sup>th</sup> decay stage      | 48°41'12"N, 19°03'07"E      | 750     | 9.IX.2015, S. Jančovičová   |
|                               | SLO 1826* | <b>Slovakia,</b><br>Muránska planina Plateau        | Tisovec town, W of the ground elevation Hradová, the National Nature Reserve Hradová  | forest of <i>Fagus sylvatica</i>                                                                       | on wood of fallen trunk of <i>Fagus sylvatica</i> , 4 <sup>th</sup> decay stage      | 48°40'50.1"N, 19°55'16.3"E  | 850     | 26.VI.2008, D. Blanár       |
|                               | SLO 2548* | <b>Slovakia,</b><br>Muránska planina Plateau        | Murán village, ca. 3 km NNW of the church, the National Nature Reserve Poludnica      | forest of <i>Fagus sylvatica</i>                                                                       | on wood of fallen trunk of <i>Fagus sylvatica</i> , 4 <sup>th</sup> decay stage      | 48°45'47"N, 20°02'35"E      | 550     | 21.VI.2002, D. Blanár       |
|                               | SLO 479*  | <b>Slovakia,</b><br>Muránska planina Plateau        | Murán village, ca. 3.5 km W of the church, the National Nature Reserve Javorníková    | forest of <i>Fagus sylvatica</i> , <i>Abies alba</i>                                                   | on wood of fallen trunk of <i>Fagus sylvatica</i> , 4 <sup>th</sup> decay stage      | 48°44'15"N, 20°00'19"E      | 500     | 27.X.2001, S. Jančovičová   |
|                               | SLO 2091* | <b>Slovakia,</b><br>Slanské vrchy Mts.              | Rankovce village, ca. 3 km E of the church, the Nature Reserve Rankovské skaly        | forest of <i>Fagus sylvatica</i> , <i>Fraxinus</i> , <i>Quercus</i>                                    | on wood of standing trunk of <i>Fraxinus excelsior</i> , 4 <sup>th</sup> decay stage | 48°49'29.8"N, 21°29'39.0"E  | 670     | 8.VII.2001, S. Jančovičová  |
|                               | SLO 2536  | <b>Slovakia,</b><br>Vihorlatské vrchy Mts.          | Remetské Hámre village, ca. 8 km N of the church, the Nature Reserve Jedlinka         | forest of <i>Fagus sylvatica</i> , <i>Abies alba</i>                                                   | on wood of fallen trunk of <i>Fagus sylvatica</i> , 4 <sup>th</sup> decay stage      | 48°54'51"N, 22°10'49"E      | 800     | 19.IX.2003, S. Jančovičová  |
|                               | SLO 2540* | <b>Slovakia,</b><br>Vihorlatské vrchy Mts.          | Remetské Hámre village, ca. 8 km N of the church, the Nature Reserve Jedlinka         | forest of <i>Fagus sylvatica</i> , <i>Abies alba</i>                                                   | on wood of fallen trunk of <i>Fagus sylvatica</i> , 4 <sup>th</sup> decay stage      | 48°54'51"N, 22°10'49"E      | 800     | 10.VI.2003, S. Jančovičová  |
|                               | SLO 2546  | <b>Slovakia,</b><br>Vihorlatské vrchy Mts.          | Remetské Hámre village, ca. 1 km E of the church, the Nature Reserve Machnatý vrch    | acidophilous <i>Fagus sylvatica</i> forest                                                             | on wood of fallen trunk of <i>Fagus sylvatica</i> , 4 <sup>th</sup> decay stage      | 48°50'54"N, 22°11'24"E      | 300–350 | 12.VII.2001, J. Ripka       |
|                               | SLO 2544* | <b>Slovakia,</b><br>Vihorlatské vrchy Mts.          | Remetské Hámre village, ca. 1 km E of the church, the Nature Reserve Machnatý vrch    | acidophilous <i>Fagus sylvatica</i> forest                                                             | on wood of fallen trunk of <i>Fagus sylvatica</i> , 4 <sup>th</sup> decay stage      | 48°50'54"N, 22°11'24"E      | 300–350 | 12.VII.2001, S. Jančovičová |
|                               | SLO 2542  | <b>Slovakia,</b>                                    | Remetské Hámre village, ca. 1 km                                                      | acidophilous <i>Fagus sylvatica</i>                                                                    | on wood of fallen trunk of                                                           | 48°50'54"N                  | 300–350 | 20.IX.2003,                 |

|                        |           |                                                    |                                                                                                  |                                                                                                         |                                                                                  |                            |     |                              |
|------------------------|-----------|----------------------------------------------------|--------------------------------------------------------------------------------------------------|---------------------------------------------------------------------------------------------------------|----------------------------------------------------------------------------------|----------------------------|-----|------------------------------|
|                        |           | Vihorlatské vrchy Mts.                             | E of the church, the Nature Reserve Machnatý vrch                                                | forest                                                                                                  | <i>Fagus sylvatica</i> , 4 <sup>th</sup> decay stage                             | 22°11'24"E                 |     | V. Kučera                    |
|                        | SLO 2530* | <b>Slovakia</b> , Vihorlatské vrchy Mts.           | Remetské Hámre village, ca. 8 km NNE of the church, the National Nature Reserve Morské oko       | forest of <i>Fagus sylvatica</i> , <i>Abies alba</i>                                                    | on wood of fallen trunk of <i>Fagus sylvatica</i> , 4 <sup>th</sup> decay stage  | 48°54'54"N, 22°12'06"E     | 650 | 19.IX.2003, S. Jančovičová   |
|                        | SLO 2526  | <b>Slovakia</b> , Vihorlatské vrchy Mts.           | Remetské Hámre village, ca. 8 km NNE of the church, the National Nature Reserve Morské oko       | forest of <i>Fagus sylvatica</i> , <i>Abies alba</i>                                                    | on wood of fallen trunk of deciduous tree, 4 <sup>th</sup> decay stage           | 48°54'54"N, 22°12'06"E     | 650 | 14.VIII.2000, S. Jančovičová |
|                        | SLO 2527  | <b>Slovakia</b> , Vihorlatské vrchy Mts.           | Remetské Hámre village, ca. 8 km NNE of the church, the National Nature Reserve Morské oko       | forest of <i>Fagus sylvatica</i> , <i>Abies alba</i>                                                    | on wood of fallen trunk of <i>Fagus sylvatica</i> , 4 <sup>th</sup> decay stage  | 48°54'54"N, 22°12'06"E     | 650 | 12.VII.2001, S. Jančovičová  |
|                        | SLO 2529  | <b>Slovakia</b> , Vihorlatské vrchy Mts.           | Remetské Hámre village, ca. 8 km NNE of the church, the National Nature Reserve Morské oko       | forest of <i>Fagus sylvatica</i> , <i>Abies alba</i>                                                    | on wood of stump of <i>Fagus sylvatica</i> , 4 <sup>th</sup> decay stage         | 48°54'54"N, 22°12'06"E     | 650 | 12.VII.2001, S. Jančovičová  |
|                        | SLO 2518  | <b>Slovakia</b> , Vihorlatské vrchy Mts.           | Hlivištia village, ca. 1.5 km E of the church                                                    | forest of <i>Carpinus betulus</i> , <i>Quercus robur</i> , <i>Q. petraea</i> , <i>Fagus sylvatica</i>   | on wood of fallen trunk of <i>Fagus sylvatica</i> , 4 <sup>th</sup> decay stage  | 48°48'19"N, 22°13'53"E     | 280 | 13.VII.2001, S. Jančovičová  |
|                        | SLO 2519  | <b>Slovakia</b> , Vihorlatské vrchy Mts.           | Hlivištia village, ca. 1.5 km E of the church                                                    | forest of <i>Carpinus betulus</i> , <i>Quercus robur</i> , <i>Q. petraea</i> , <i>Fagus sylvatica</i>   | on wood of stump of <i>Fagus sylvatica</i> , 4 <sup>th</sup> decay stage         | 48°48'19"N, 22°13'53"E     | 280 | 13.VII.2001, J. Terray       |
|                        | SLO 2520  | <b>Slovakia</b> , Vihorlatské vrchy Mts.           | Hlivištia village, ca. 1.5 km E of the church                                                    | forest of <i>Carpinus betulus</i> , <i>Quercus robur</i> , <i>Q. petraea</i> , <i>Fagus sylvatica</i>   | on wood of fallen trunk of <i>Fagus sylvatica</i> , 4 <sup>th</sup> decay stage  | 48°48'19"N, 22°13'53"E     | 280 | 13.VII.2001, J. Terray       |
|                        | SLO 2541* | <b>Slovakia</b> , Bukovské vrchy Mts.              | ca. 2 km NNE of the former village of Ruské                                                      | forest of <i>Fagus sylvatica</i> and mixed beech forest                                                 | on wood of fallen branch of <i>Fagus sylvatica</i> , 4 <sup>th</sup> decay stage | 49°07'38"N, 22°20'33"E     | 550 | 23.VII.2020, S. Jančovičová  |
|                        | SLO 1845* | <b>Russia</b> , the Republic of Tatarstan          | Raifa village, ca. 3 km SSW of the church, the Volzhsko-Kamsky National Nature Biosphere Reserve | forest of <i>Tilia</i> , <i>Acer</i> , <i>Quercus</i> , <i>Populus tremula</i>                          | on wood of fallen trunk of <i>Quercus</i> , 4 <sup>th</sup> decay stage          | 55°52'28.3"N, 48°43'7.6"E  | 90  | 23.VIII.2016, T. Svetasheva  |
|                        | SLO 2394* | <b>Czech Republic</b> , Dražanská vrchovina Upland | Brno city, ca. 0.5 km NE of the borough of Brno-Útěchov, the Nature Reserve Coufava              | forest of <i>Fagus sylvatica</i> , <i>Quercus petraea</i> , <i>Carpinus betulus</i> , <i>Abies alba</i> | on wood of fallen trunk of <i>Fagus sylvatica</i> , 4 <sup>th</sup> decay stage  | 49°17'39.7"N, 16°38'15.3"E | 440 | 30.VIII.2017, D. Dvořák      |
|                        | SLO 2549  | <b>Czech Republic</b> , Dražanská vrchovina Upland | Brno city, ca. 0.5 km NE of the borough of Brno-Útěchov, the Nature Reserve Coufava              | forest of <i>Fagus sylvatica</i> , <i>Quercus petraea</i> , <i>Carpinus betulus</i> , <i>Abies alba</i> | on wood of fallen trunk of <i>Fagus sylvatica</i> , 4 <sup>th</sup> decay stage  | 49°17'39.7"N, 16°38'15.3"E | 440 | 30.VIII.2017, D. Dvořák      |
| <i>Crepidotus pini</i> | SLO 2550* | <b>Slovakia</b> , Záhorská nížina Lowland          | Záhorie military district, Malacky town, ca. 4 km E of the hospital, game preserve               | about 80 years old forest of <i>Pinus sylvestris</i> with admixed <i>Quercus</i>                        | on wood of stump of <i>Pinus sylvestris</i> , 4 <sup>th</sup> decay stage        | 48°26'15"N, 17°05'03"E     | 190 | 30.IX.2017, S. Jančovičová   |
|                        | SLO 2601* | <b>Slovakia</b> , Záhorská nížina Lowland          | Záhorie military district, Rohožník village, ca. 3 km W of the church                            | about 100 years old forest of <i>Pinus sylvestris</i>                                                   | on wood of stump of <i>Pinus sylvestris</i> , 3 <sup>rd</sup> decay stage        | 48°27'18"N, 17°07'39"E     | 220 | 28.VIII.2021, S. Jančovičová |
|                        | SLO 2602  | <b>Slovakia</b> , Záhorská nížina                  | Záhorie military district, Rohožník village, ca. 3 km W of the church                            | about 100 years old forest of <i>Pinus sylvestris</i>                                                   | on wood of stump of <i>Pinus sylvestris</i> , 3 <sup>rd</sup> decay stage        | 48°27'18"N, 17°07'39"E     | 220 | 19.IX.2021, S. Jančovičová   |

|                                         |           |                                                           |                                                                                            |                                                                                                                                            |                                                                                                           |                             |      |                               |
|-----------------------------------------|-----------|-----------------------------------------------------------|--------------------------------------------------------------------------------------------|--------------------------------------------------------------------------------------------------------------------------------------------|-----------------------------------------------------------------------------------------------------------|-----------------------------|------|-------------------------------|
|                                         | SLO 2579* | Lowland<br><b>Slovakia,</b><br>Záhorská nížina<br>Lowland | Záhorie military district, Rohožník<br>village, ca. 1.5 km W of the church                 | about 100 years old forest of<br><i>Pinus sylvestris</i> and self-sown<br><i>Carpinus betulus</i> , <i>Quercus</i> and<br><i>Crataegus</i> | on wood of stump of <i>Pinus</i><br><i>sylvestris</i> , 4 <sup>th</sup> decay stage                       | 48°27'41"N,<br>17°08'52"E   | 210  | 12.IX.2020,<br>S. Jančovičová |
|                                         | SLO 2623  | <b>Slovakia,</b><br>Záhorská nížina<br>Lowland            | Záhorie military district, Rohožník<br>village, ca. 1.5 km W of the church                 | about 100 years old forest of<br><i>Pinus sylvestris</i> and self-sown<br><i>Carpinus betulus</i> , <i>Quercus</i> and<br><i>Crataegus</i> | on wood of stump of <i>Pinus</i><br><i>sylvestris</i> , 4 <sup>th</sup> to 5 <sup>th</sup> decay<br>stage | 48°27'41"N,<br>17°08'52"E   | 210  | 26.IX.2021,<br>S. Jančovičová |
|                                         | SLO 2622  | <b>Slovakia,</b><br>Záhorská nížina<br>Lowland            | Záhorie military district, Rohožník<br>village, ca. 1.5 km W of the church                 | about 100 years old forest of<br><i>Pinus sylvestris</i> and self-sown<br><i>Carpinus betulus</i> , <i>Quercus</i> and<br><i>Crataegus</i> | on wood of stump of <i>Pinus</i><br><i>sylvestris</i> , 4 <sup>th</sup> decay stage                       | 48°27'41"N,<br>17°08'52"E   | 210  | 10.X.2021,<br>S. Jančovičová  |
| <i>Crepidotus</i><br><i>stenocystis</i> | SLO 2557* | <b>Slovakia,</b><br>Liptovská kotlina<br>Basin            | Vážec village, ca. 4 km NNE of the<br>church, the forest along the<br>Solisková voda creek | forest of <i>Picea abies</i> , <i>Betula</i> ,<br><i>Salix</i>                                                                             | on wood of fallen trunk of<br><i>Abies alba</i> , 4 <sup>th</sup> decay stage                             | 49°05'36"N,<br>19°59'59"E   | 880  | 29.IX.2003,<br>I. Kautmanová  |
|                                         | SLO 481*  | <b>Slovakia,</b><br>Veporské vrchy<br>Mts.                | Polomka village, ca. 8.5 km SSE of<br>the church, the Nature Reserve<br>Fabova hoľa        | forest of <i>Picea abies</i> with<br><i>Sorbus aucuparia</i> in the<br>understory                                                          | on wood of stump of <i>Picea</i><br><i>abies</i> , 4 <sup>th</sup> decay stage                            | 48°46'47.1"N,<br>19°52'51"E | 1360 | 1.X.2009,<br>D. Blanár        |
